# Supplementary material for: Dietary limonin alleviates Salmonella Typhimurium-induced colitis via dual targeting virulence SopB and SopE2 and inhibiting RAC1/CDC42/Arp2/3 pathway and regulating gut microbiota
Source: Royal Society of Chemistry journal article supplement (doi:10.1039/d4fo02810d), 2025-01-01
Supplement: d4fo02810d2.xlsx [file d4fo02810d2.xlsx]

## Sheet: Sheet1
Sample group	input	filtered	percentage of input passed filter	denoised	merged	percentage of input merged	non-chimeric	percentage of input non-chimeric	Total_ASVs	ASV_counts
CON group	118196	114410	96.8	112990	104178	88.14	84863	71.8	4676	298
CON group	89365	86262	96.53	83935	68906	77.11	41367	46.29	4676	569
CON group	137242	132340	96.43	130466	123738	90.16	108388	78.98	4676	521
CON group	101158	97938	96.82	96551	90826	89.79	66228	65.47	4676	182
CON group	112259	109356	97.13	104554	95413	76.73	76441	65.47	4676	294
STM group	110360	106725	96.71	102785	76875	69.66	45884	41.58	4676	893
STM group	112071	108873	97.15	105363	81349	72.59	52217	46.59	4676	829
STM group	98039	95030	96.93	91865	71437	72.87	48126	49.09	4676	792
STM group	109901	106765	97.15	103760	83087	75.6	51839	47.17	4676	641
STM group	105152	101093	96.14	98794	87307	83.03	73054	69.47	4676	617
STM + Limonin group	103974	100539	96.7	98682	85822	82.54	48422	46.57	4676	553
STM + Limonin group	104381	101148	96.9	99754	91596	87.75	75422	72.26	4676	458
STM + Limonin group	182273	176412	96.78	173117	153654	84.3	114638	62.89	4676	756
STM + Limonin group	153616	148107	96.41	144266	119194	77.59	88390	57.54	4676	791
STM + Limonin group	157602	151663	96.23	148880	128180	81.33	93708	59.46	4676	638
