# Supplementary figures and images for: Dietary limonin alleviates Salmonella Typhimurium-induced colitis via dual targeting virulence SopB and SopE2 and inhibiting RAC1/CDC42/Arp2/3 pathway and regulating gut microbiota
Source: Royal Society of Chemistry journal article supplement (doi:10.1039/d4fo02810d), 2025-01-01

(Continued Figure S1)

E

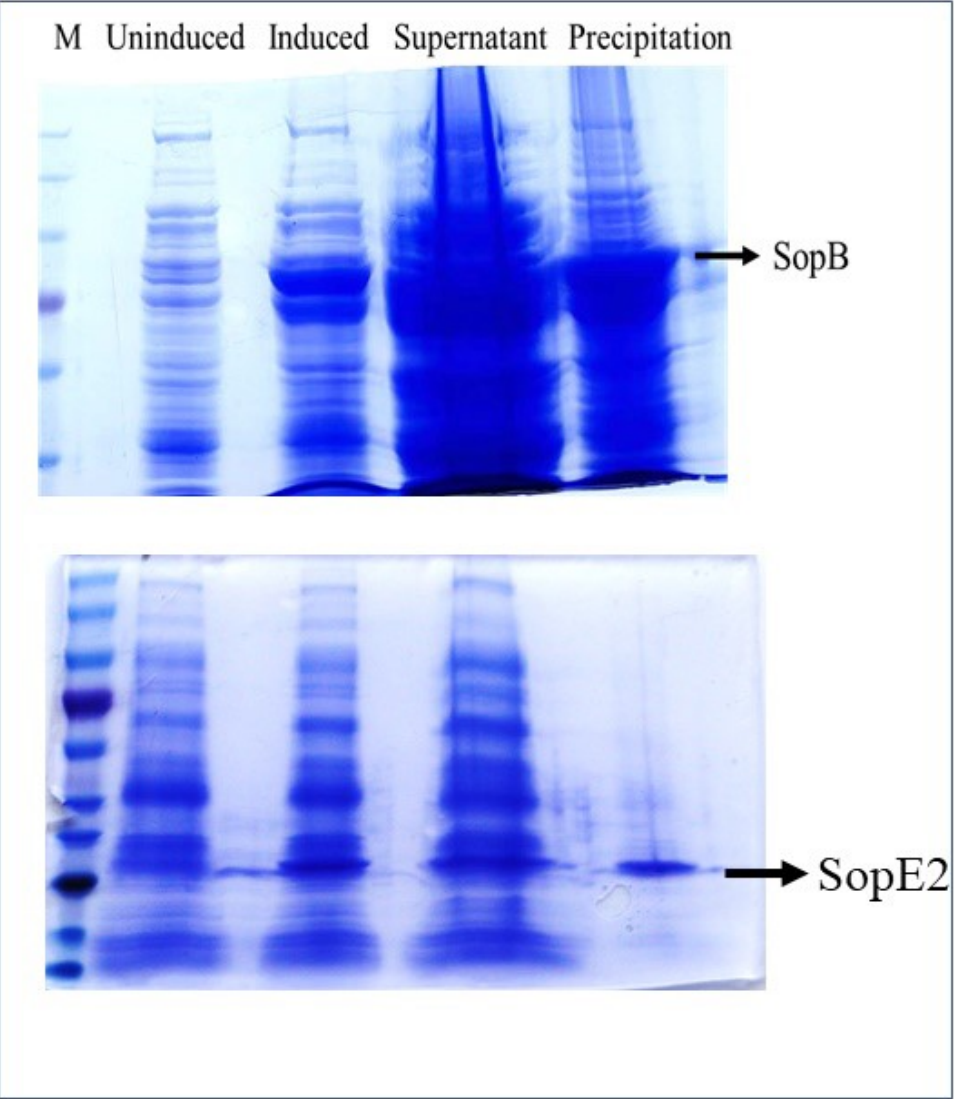

F

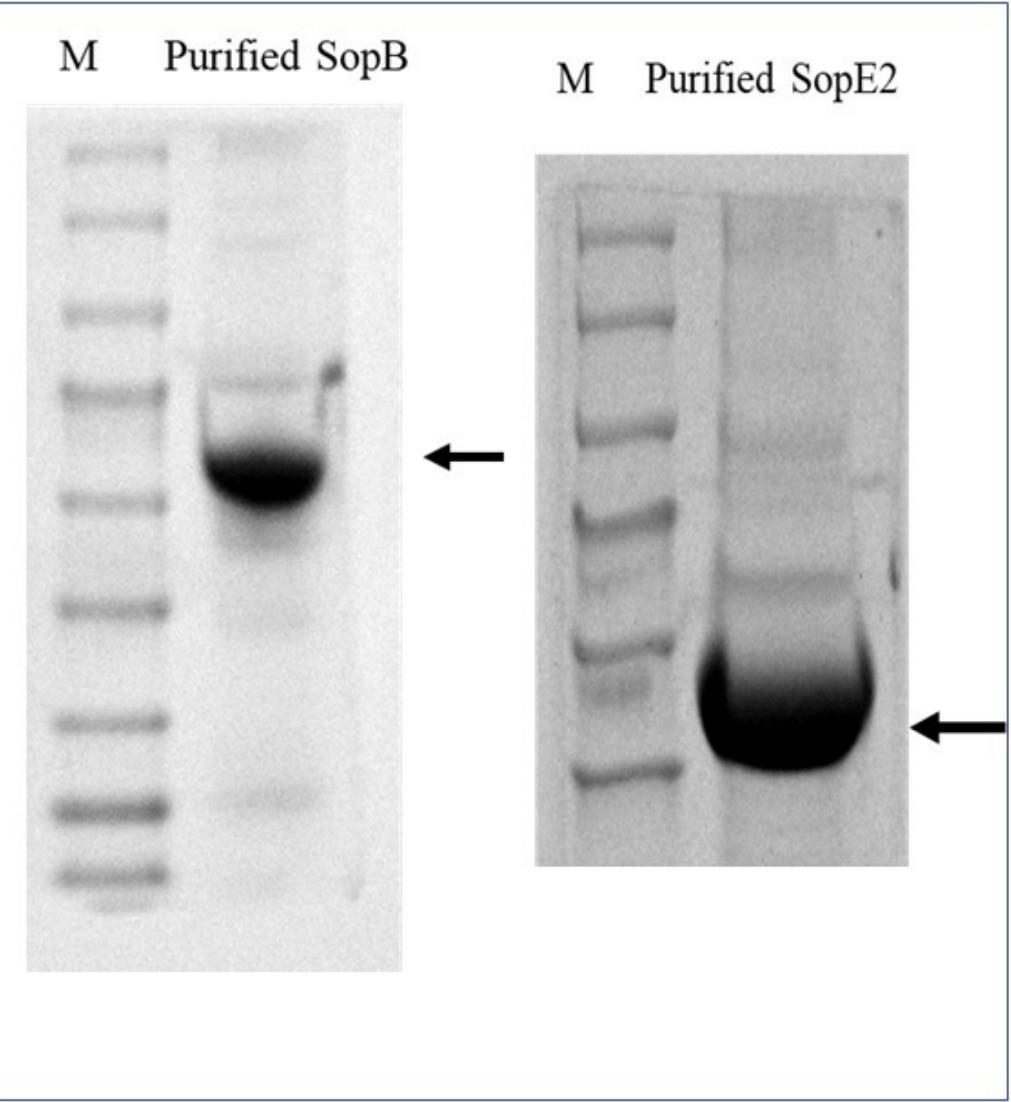

(To be continued)

Supplement: d4fo02810d4.pdf [file d4fo02810d4.pdf]
